# Supplementary material for: Desktop nanofabrication with massively multiplexed beam pen lithography
Source: Springer Nature journal article supplement (doi:10.1038/ncomms3103), 2013-07-19
Supplement: ncomms3103-s1.pdf [file ncomms3103-s1.pdf]

Desktop nanofabrication with massively multiplexed beam pen lithography | Nature Communications


Skip to main content

Thank you for visiting nature.com. You are using a browser version with limited support for CSS. To obtain
the best experience, we recommend you use a more up to date browser (or turn off compatibility mode in
Internet Explorer). In the meantime, to ensure continued support, we are displaying the site without styles
and JavaScript.

Advertisement

- View all journals
- Search
- Log in

- Explore content
- About the journal
- Publish with us

- Sign up for alerts
- RSS feed


1. nature
2. nature communications
3. articles
4. article

Desktop nanofabrication with massively multiplexed beam pen lithography

Download PDF

- Article
- Published: 19 July 2013

# Desktop nanofabrication with massively multiplexed beam pen lithography

- Xing Liao1,2na1,
- Keith A. Brown2,3na1,
- Abrin L. Schmucker2,3,
- Guoliang Liu2,3,
- Shu He2,3,
- Wooyoung Shim1,2 &
- …
- Chad A. Mirkin1,2,3

Show authors

*Nature Communications*
**volume 4**, Article number: 2103 (2013)
Cite this article

- 6054 Accesses
- 87 Citations
- 98 Altmetric
- Metrics details

### Subjects

- Materials science
- Techniques and instrumentation

## Abstract

The development of a lithographic method that can rapidly define nanoscale features across centimetre-scale surfaces has been a long-standing goal for the nanotechnology community. If such a ‘desktop nanofab’ could be implemented in a low-cost format, it would bring the possibility of point-of-use nanofabrication for rapidly prototyping diverse functional structures. Here we report the development of a new tool that is capable of writing arbitrary patterns composed of diffraction-unlimited features over square centimetre areas that are in registry with existing patterns and nanostructures. Importantly, this instrument is based on components that are inexpensive compared with the combination of state-of-the-art nanofabrication tools that approach its capabilities. This tool can be used to prototype functional electronic devices in a mask-free fashion in addition to providing a unique platform for performing high-throughput nano- to macroscale photochemistry with relevance to biology and medicine.

You have full access to this article via your institution.

Download PDF

Download PDF

### Similar content being viewed by others

### Thermal scanning probe lithography

Article
05 May 2022

Edoardo Albisetti, Annalisa Calò, … Elisa Riedo

### Binary-state scanning probe microscopy for parallel imaging

Article
Open access
17 March 2022

Gwangmook Kim, Eoh Jin Kim, … Wooyoung Shim

### High-resolution combinatorial patterning of functional nanoparticles

Article
Open access
26 November 2020

Xing Xing, Zaiqin Man, … Zhenda Lu

## Introduction

The pace of development in many areas of nanotechnology, physics, electronics, chemistry and biology is determined by the availability of reliable pattern generation tools. Therefore, a long-standing goal in these communities is the realization of a desktop nanofabrication tool that combines low-cost and high-resolution patterning with high-throughput operation. Such a tool would revolutionize the field in a manner analogous to the way that the desktop printer has revolutionized information transfer. However, desktop nanofabrication remains a formidable challenge because direct write systems available today, such as those that employ electron beam lithography (EBL)1, near-field optical lithography2,3,4,5,6,7, zone plate array lithography8, dip-pen nanolithography9,10 and related molecular printing techniques11,12,13,14, impose tradeoffs between throughput, cost and feature size. The low cost and parallel nature of photolithography make it a promising candidate for desktop nanofabrication, but for this to be realized, diffraction-unlimited features must be attainable. There are many methods to circumvent the diffraction limit, including operating in the near-field regime15, utilizing two-photon processes16, incorporating plasmonic materials to locally enhance light17,18 and constructing superlenses from negative index of refraction materials19. One promising technique that utilizes near-field apertures to overcome the diffraction limit is beam pen lithography (BPL)6, in which apertures with sub-wavelength dimensions at the tip of each gold-coated elastomeric pen in a massive array are used to perform scanning near-field optical lithography. However, there are two major challenges that have prevented BPL from being transitioned into a legitimate desktop nanofabrication tool: (1) all pens in the array act in unison, making this technique useful only for generating replicas of patterns, and (2) apertures are either constructed serially using a focused ion beam or in parallel using a mechanical stripping technique that yields >500 nm pores.

Here, we report advances that address both of these issues and transform BPL into a real desktop tool capable of nanofabrication. This approach was made possible by combining BPL with a digital micromirror device such as those used in maskless lithography20,21 and developing a novel strategy for coordinating the light addressing each pen with the motion of the pen array (Fig. 1 and Supplementary Fig. S1). Once the light reaches the pen array, three structural aspects of the array6,22 enable it to effectively perform near-field lithography: (1) a rigid and transparent glass backing layer allows light to reach the pens while structurally supporting the pen array, (2) the mechanical compliance of the polydimethylsiloxane pens allows them to be in gentle simultaneous contact with the surface and (3) the opaque gold coating and nanoscale size of the apertures in the array allow for nanoscale confinement of light. Using the resulting tool, we have fabricated centimetre-scale arrangements of nanoscale features to illustrate the ability of this actuated BPL approach to function as a general desktop nanofab. This transformative combination preserves the high spatial resolution of near-field optical lithography while gaining the ability to independently control the patterns generated by each pen in a massive and parallel fashion, creating a unified tool for constructing and studying nanomaterials.

**Figure 1: Schematic of actuated BPL.**

(**a**) Schematic of the principle of operation of actuated BPL. A digital micromirror device (DMD) is illuminated with ultraviolet light, which is selectively directed onto the back of a near-field aperture array. (**b**) Scanning electron microscope (SEM) image of section of the BPL tip array. Each pyramidal pen in the array has a sub-wavelength aperture that has been opened in a parallel fashion.

Full size image

## Results

### Diffraction-unlimited nanopatterning

The sub-wavelength apertures at the tip of each probe of a BPL pen array are crucial to the operation of actuated BPL and must be fabricated in a parallel and uniform fashion to preserve the low cost and scalable nature of this process. In a typical experiment, polymer pen arrays are moulded from Si masters and coated with an opaque layer (see Methods). To fabricate small and uniform apertures at the tip of each probe, we utilized a variant of a method that combines dry and wet etching23 (Supplementary Fig. S2) to controllably fabricate apertures with diameters of 103±12 nm (Fig. 1b). This important advance in BPL pen array fabrication allows for massively parallel diffraction-unlimited writing.

As with any lithography system, it is important to establish the fundamental constitutive units from which patterns can be generated. In a typical experiment, a BPL pen array was mounted in a scanning probe lithography system and leveled with respect to a photoresist-coated Si wafer using an optical leveling procedure. To expose a region of the resist, the pens were brought into contact with the surface, and the back side of the pen array was illuminated with ultraviolet light with wavelength *λ*=405 nm while the array was held still for a specified exposure time. The sub-λ apertures block propagating light, and create an intensity profile that decays exponentially with distance from the aperture3,24. To optimize the exposure time, a dose test was performed in which the pen array wrote a series of dots (Fig. 2a) with exposure times between 2 and 4 s. At an effective exposure dose of 2 s, the dot features had an average diameter of 122±12 nm, which is substantially smaller than λ/2, demonstrating diffraction-unlimited performance. At longer exposure times, larger features were written, demonstrating control over feature size with exposure dose (Fig. 2b)15. In contrast to writing dots with the pens held still, moving the pens at a constant velocity across the sample while in contact allows one to write lines. Au lines with widths of 380±19, 842±17, 1,170±20 and 1,530±20 nm were written by scanning the tip array at 4, 2, 1 and 0.5 μm s−1, respectively. In these experiments, the structures written by the pens were visualized by scanning electron microscopy after they had been coated with 5 nm of Cr and 25 nm of Au in a standard lift-off process. Interestingly, the root-mean-square line edge roughness of these features was 30 nm, highlighting the ability of actuated BPL to write high-quality lines.

**Figure 2: Constitutive patterning units.**

(**a**) Dots written by a single pen in the BPL array. The exposure dose varies linearly from 2 s on the left to 4 s on the right, the inset shows the detailed morphology of a dot generated with a 2 s exposure. The scale bar is 5 μm and the scale bar in the inset is 100 nm. (**b**) Plots of feature diameter versus exposure dose (black square, bottom and left axes) and line width versus writing speed (red circle, top and right axes). Features with an average size of 122 nm were consistently written. Error bars represent the standard deviation in dot diameter, error in line width is smaller than the marker size. (**c**) Line patterns written at varying scan speed. The longest lines are 80 μm long.

Full size image

### Large-area arbitrary nanolithography

Having established the core structures that actuated BPL can be used to write, we explored the potential of using its massively parallel and individually addressable nature to generate centimetre-scale arbitrary patterns composed of nanoscale features. The lithographic procedure entailed sequentially moving the pen array through an array of points on the sample while the digital micromirror device displayed images extracted from a master image. To achieve registry between the projected image and the pens, a novel alignment procedure (Supplementary Fig. S3) and custom software were used (Supplementary Fig. S4). To evaluate whether this technique could be used to generate centimetre-scale patterns composed of nanoscale features, a 8,100 pen array was used to generate a mosaic map of the world (Fig. 3a) wherein each tile of the world image (Fig. 3c) was a bitmap depicting the structure of a unique molecule from the PubChem database (for the high-resolution master image, see Supplementary Fig. S5). Importantly, this pattern was chosen to highlight the multiscale nature of patterning as the macroscale pattern (the map of the world) is composed of microscale objects (chemical formulae), which are in turn entirely composed of nanoscale dot features. The final pattern consists of 1.3 million dot features arranged to define 900 molecular structures in a 9 × 9 mm2 area. In order to differentiate between molecules in the ‘land’ and ‘ocean’ regions of the world map, the exposure dose used to define the points in the land regions was twice that of the points in the ocean regions. After gold deposition and resist lift-off, the pattern consisted of 144±11 nm average diameter dot features in the regions corresponding to ocean (Fig. 3d) and 750±22 nm average diameter dot features written in the regions corresponding to land (Fig. 3c), all with a 1 μm pitch, demonstrating high quality control of light over the macro- to nanoscale. It is important to note that both the large and small features were written in the same experiment through control of the fraction of the total time that each mirror was activated. This pattern contains features that are too small to be fabricated using conventional optical techniques; it would be necessary to use EBL to even attempt to write such a pattern.

**Figure 3: Large-area arbitrary patterning with actuated BPL.**

(**a**) Photographic image of an arbitrary pattern 9 × 9 mm2 in size, a portion of a ruler is shown for scale. (**b**) Magnified photograph of the pattern in **a**, with an inset depicting the image from which the mosaic was generated. (**c**) Scanning electron microscopy (SEM) image showing a molecule in the ‘land’ region. (**d**) SEM image showing a portion of a molecule in the ‘ocean’ region. The scale bar is 1 μm. (**e**) SEM image of an arbitrary pattern that consists of an array of planar resistors and capacitors with 120 nm line widths connected by an array of 2-μm-wide wires. This region of the pattern was written by contributions from 96 pens. The scale bar is 100 μm. (**f**–**i**) Four magnified examples of nanoscale circuit elements, whose positions are marked by red boxes in (**e**). The scale bar in (**i**) is 2 μm and the scale is the same for (**f–i**).

Full size image

As many example applications for which this tool would be useful require line features in addition to dot features, it is necessary to evaluate whether actuated BPL can be used to write large-area arbitrary patterns consisting of lines with sub-wavelength dimensions. To probe this, a patterning experiment was performed in which each probe was directed to write a 10 × 10 μm2 resistor or capacitor at high resolution (50 nm pitch between points) and subsequently connect these elements together with a network of wires written in a 100 × 100 μm2 region at low resolution (500 nm pitch between points). The result is a continuous network of ~2-μm-wide lines that span the entire surface (Fig. 3e) and connect an array of circuit elements comprised of 120±35-nm-wide wires (Fig. 3f–i). This pattern design was chosen as a proof-of-concept to mimic the architecture of small devices connected by larger interconnects commonly found in integrated circuits.

### Fabrication of functional devices

The capabilities of actuated BPL were further evaluated by attempting to pattern functional circuits whose performance would be an indicator of successful patterning. To this end, arrays of Au serpentine resistors with varying lengths were fabricated on a Si wafer using actuated BPL (Fig. 4a). All resistors required the coordination of multiple pens with the largest requiring 15 pens and consisting of a 4-mm-long, 2-μm-wide continuous wire. Current–voltage characterization of 61 simultaneously patterned devices revealed that all measured devices exhibited Ohmic behaviour with resistances that depended linearly on the programmed line length (Fig. 4b). The sheet resistance of the resistors was computed by determining the slope of the linear fit and used to a sheet resistance of 0.32 Ω per square, in agreement with the tabulated value of 0.4 Ω per square for 50-nm-thick gold25. Furthermore, planar capacitors, inductors and surface acoustic wave (SAW) transducers were also patterned (Fig. 4c). It required 57 pens to write each capacitor, 51 pens to write each inductor and 110 pens to generate a pair of SAW transducers. To verify the function of the SAW transducers, they were combined with radio frequency amplifiers (Supplementary Fig. S6) to form a delay line oscillator26,27 whose resonance frequency of 11.9 MHz matches very well with the theoretical prediction of 12.3 MHz (Fig. 4d).

**Figure 4: Patterning active circuits with actuated BPL.**

(**a**) Serpentine resistors patterned by actuated BPL. Each resistor is formed of between 3 and 15 pens with the longest consisting of a 4 mm continuous line. The scale bar is 100 μm. (**b**) Plot of the resistance versus resistor length (black dots) with linear fitting (red line). Error bars represent the standard deviation in resistance from between 3 and 9 samples per resistor length. (**c**) Inductors, capacitors and a SAW sensor created by actuated BPL. The scale bar is 1 mm. (**d**) Frequency spectrum of the patterned SAW device. Noise spectrum was measured before the device was connected to the oscilloscope.

Full size image

### Patterning in registry with existing nanostructures

While piezoelectric control over the sample position allows features to be written with exceptionally high control over their position relative to one other, for many applications it is also necessary to generate patterns that are aligned to existing structures on a surface. To evaluate the potential of actuated BPL to pattern in registry with existing patterns, 150-nm-diameter semiconductor nanowires were dispersed on a silicon wafer with electrical contact pads and fiducial marks, imaged by optical microscopy (Supplementary Fig. S7), and spin-coated with photoresist. Actuated BPL was then used to make electrical connection to the randomly dispersed nanowires by patterning electrical leads designed for this arrangement of nanowires (Supplementary Fig. S8) after aligning the BPL pen array to the alignment marks on the sample, and writing the pattern (Fig. 5a). In this experiment, an array consisting of 729 (27 × 27) pens was used to write connections to 60 wires that had been located by optical microscopy. Patterning of this type, traditionally done by EBL1, shows how actuated BPL can be used to rapidly pattern in a mask-free fashion with registry to existing nanostructures. The success of this task was evaluated by measuring the number of patterned connections (59/60) and working devices after the lift-off process (40/60) (Fig. 5b). Finally, the electrical transport of the nanowire structures exhibited clear semiconducting behaviour (Fig. 5c), as one would expect for a working device.

**Figure 5: Patterns written in registry with existing patterns and nanostructures.**

(**a**) The three-step process used to electrically connect randomly dispersed nanowires to existing electrodes: left, Si nanowires are distributed on a substrate with alignment marks and connection pads; middle, pattern was designed and transferred to the substrate by actuated BPL; right, 5 nm Cr and 150 nm Au were evaporated on the substrate and followed by lift-off. The scale bar is 100 μm. (**b**) Scanning electron microscopy image showing the whole substrate with the nanowires connected to the electrodes; the four insets show individual nanowire connections. The scale bar for the magnified panels is 5 μm. (**c**) Electrical characterization of a connected nanowire. Plot of the drain-source current (*I*DS) versus back gate voltage (*V*BG) with drain-source voltage of 1 V. The inset shows I–V curves of the device with different gate voltage, showing a characteristic transistor behaviour.

Full size image

## Discussion

Taken together, these data provide evidence for the first true desktop nanofabrication tool based upon easily fabricated BPL pen arrays, a novel strategy of actuation and a relatively simple scanning probe platform. This is the first such tool to allow one to rapidly generate structures of interest that span the macro-, micro- and nanoscales all in one experiment. The unique cantilever-free architecture makes this possible as light can be independently guided down the microscopic pyramid backing of each pen and confined through the nanoscale apertures in a high-throughout and high-yield fashion. Here, we show that features with sizes spanning 120 nm to several micrometres can be easily generated in a mask-free and scalable fashion; however, it is important to emphasize that these results represent only a proof-of-concept demonstration and not the fundamental limitation of the technique. For example, smaller apertures should enable sub-100 nm features5 and improved engineering could enable writing speeds up to 2 mm2 s−1 (Supplementary Methods). It is also worth noting that in addition to rapid prototyping applications in industrial or academic settings, this technique will also enable controlled light-mediated synthesis in localized spaces, which is becoming increasingly important in chemistry and biology.

## Methods

### Pen array fabrication

BPL pen arrays were fabricated starting with PPL pen arrays whose fabrication is described elsewhere6,11. The pen arrays were coated with 5 nm of Ti followed by 200 nm of Au to make them opaque, and then spin-coated with poly(methyl methacrylate) (PMMA 950 c7, MicroChem Inc., USA). Following coverage of the array, reactive ion etching was employed to isotropically etch the PMMA until the apexes of the pens were exposed. Subsequently, the gold at the apex of each pen was removed through a selective chemical etch (Gold Etchant TFA, Transense Company Inc., USA), leaving an aperture at the tip of each pen in the array. Residual PMMA was removed by rinsing in acetone.

### Lithographic procedure

Si wafers with 500 nm of thermal oxide were spin-coated with lift-off resist (LOR Series, MicroChem Inc.) followed by S1805 (MicroChem Inc.) or AZ 1505 photoresist (MicroChemicals GmbH, Germany). Samples were then mounted in the actuated BPL apparatus and leveled following an optical leveling procedure. Patterns were then exposed in a frame-by-frame manner and subsequently developed in MF24A (MicroChem Inc.). Typically, 5 nm Cr and 15 nm Au were evaporated onto the sample followed by an overnight lift-off in Remover PG (MicroChem Inc.). Final patterns were characterized using atomic force microscopy (Dimension Icon, Bruker, USA), optical microscopy (Axiovert, Zeiss, USA) and scanning electron microscopy (S-4800-II and SU8030, Hitachi, Japan).

### Additional details

The Supplementary Methods contains further details regarding the actuated BPL apparatus, the fabrication of BPL pen arrays, the alignment procedure used to align the projected light to the BPL pen arrays, the software control of actuated BPL and the general lithography procedure used to generate patterns. In addition, further details are provided regarding the design and testing of the SAW delay line oscillator and the nanowire connection procedure.

## Additional information

**How to cite this article:** Liao, X. *et al*. Desktop nanofabrication with massively multiplexed beam pen lithography. *Nat. Commun.* 4:2103 doi: 10.1038/ncomms3103 (2013).

## References

1. Vieu, C. et al. Electron beam lithography: resolution limits and applications. *Appl. Surf. Sci.* **164**, 111–117 (2000).

   Article 
   CAS 
   ADS 
   Google Scholar
2. Betzig, E. & Trautman, J. K. Near-field optics: microscopy, spectroscopy, and surface modification beyond the diffraction limit. *Science* **257**, 189–195 (1992).

   Article 
   CAS 
   ADS 
   Google Scholar
3. Novotny, L., Pohl, D. W. & Regli, P. Light propagation through nanometer-sized structures: the two-dimensional-aperture scanning near-field optical microscope. *J. Opt. Soc. Am. A* **11**, 1768–1779 (1994).

   Article 
   ADS 
   Google Scholar
4. Smolyaninov, I. I., Mazzoni, D. L. & Davis, C. C. Near-field direct-write ultraviolet lithography and shear force microscopic studies of the lithographic process. *Appl. Phys. Lett.* **67**, 3859–3861 (1995).

   Article 
   CAS 
   ADS 
   Google Scholar
5. Sun, S. & Leggett, G. J. Matching the resolution of electron beam lithography by scanning near-field photolithography. *Nano Lett.* **4**, 1381–1384 (2004).

   Article 
   CAS 
   ADS 
   Google Scholar
6. Huo, F. et al. Beam pen lithography. *Nat. Nanotech.* **5**, 637–640 (2010).

   Article 
   CAS 
   ADS 
   Google Scholar
7. Haq, E. u. et al. Parallel scanning near-field photolithography: the snomipede. *Nano Lett.* **10**, 4375–4380 (2010).

   Article 
   ADS 
   Google Scholar
8. Chao, D., Patel, A., Barwicz, T., Smith, H. I. & Menon, R. Immersion zone-plate-array lithography. *J. Vac. Sci. Technol. B* **23**, 2657–2661 (2005).

   Article 
   CAS 
   Google Scholar
9. Piner, R. D., Zhu, J., Xu, F., Hong, S. & Mirkin, C. A. ‘Dip-Pen’ nanolithography. *Science* **283**, 661–663 (1999).

   Article 
   CAS 
   Google Scholar
10. Salaita, K., Wang, Y. & Mirkin, C. A. Applications of dip-pen nanolithography. *Nat. Nanotech.* **2**, 145–155 (2007).

    Article 
    CAS 
    ADS 
    Google Scholar
11. Huo, F. et al. Polymer pen lithography. *Science* **321**, 1658–1660 (2008).

    Article 
    CAS 
    ADS 
    Google Scholar
12. Giam, L. R. & Mirkin, C. A. Cantilever-free scanning probe molecular printing. *Angew. Chem. Int. Ed.* **50**, 7482–7485 (2011).

    Article 
    CAS 
    Google Scholar
13. Braunschweig, A. B., Huo, F. & Mirkin, C. A. Molecular printing. *Nat. Chem.* **1**, 353–358 (2009).

    Article 
    CAS 
    Google Scholar
14. Shim, W. et al. Hard-tip, soft-spring lithography. *Nature* **469**, 516–520 (2011).

    Article 
    CAS 
    ADS 
    Google Scholar
15. Leggett, G. J. Light-directed nanosynthesis: near-field optical approaches to integration of the top-down and bottom-up fabrication paradigms. *Nanoscale* **4**, 1840–1855 (2012).

    Article 
    CAS 
    ADS 
    Google Scholar
16. Tanaka, T., Sun, H.-B. & Kawata, S. Rapid sub-diffraction-limit laser micro/nanoprocessing in a threshold material system. *Appl. Phys. Lett.* **80**, 312–314 (2002).

    Article 
    CAS 
    ADS 
    Google Scholar
17. Srituravanich, W. et al. Flying plasmonic lens in the near field for high-speed nanolithography. *Nat. Nanotech.* **3**, 733–737 (2008).

    Article 
    CAS 
    ADS 
    Google Scholar
18. Pan, L. et al. Maskless plasmonic lithography at 22 nm resolution. *Sci. Rep.* **1**, 175 (2011).

    Article 
    CAS 
    Google Scholar
19. Zhang, X. & Liu, Z. Superlenses to overcome the diffraction limit. *Nat. Mater.* **7**, 435–441 (2008).

    Article 
    CAS 
    ADS 
    Google Scholar
20. Sun, C., Fang, N., Wu, D. M. & Zhang, X. Projection micro-stereolithography using digital micro-mirror dynamic mask. *Sens. Actuators A* **121**, 113–120 (2005).

    Article 
    CAS 
    Google Scholar
21. Ryoo, H., Kang, D. W. & Hahn, J. W. Analysis of the line pattern width and exposure efficiency in maskless lithography using a digital micromirror device. *Microelectron. Eng.* **88**, 3145–3149 (2011).

    Article 
    CAS 
    Google Scholar
22. Qin, D., Xia, Y. & Whitesides, G. M. Elastomeric light valves. *Adv. Mater.* **9**, 407–410 (1997).

    Article 
    CAS 
    Google Scholar
23. Huan, H. et al. Nano-fabrication with a flexible array of nano-apertures. *Nanotechnology* **23**, 175303 (2012).

    Article 
    ADS 
    Google Scholar
24. Hecht, B. et al. Scanning near-field optical microscopy with aperture probes: fundamentals and applications. *J. Chem. Phys.* **112**, 7761–7774 (2000).

    Article 
    CAS 
    ADS 
    Google Scholar
25. *CRC Handbook of Chemistry and Physics* 93rd edn (ed. Haynes, W. M.)12–41CRC Press/Taylor and Francis (2012).
26. Slobodnik, A. J. Jr. Surface acoustic waves and SAW materials. *Proc. IEEE* **64**, 581–595 (1976).

    Article 
    CAS 
    Google Scholar
27. Wohltjen, H. & Dessy, R. Surface acoustic wave probe for chemical analysis. I. Introduction and instrument description. *Anal. Chem.* **51**, 1458–1464 (1979).

    Article 
    CAS 
    Google Scholar

Download references

## Acknowledgements

This material is based upon work supported by DARPA/MTO Award N66001-08-1-2044, AOARD Award FA2386-10-1-4065, AFOSR Awards FA9550-12-1-0280 and FA9550-12-1-0141, NSF Awards DBI-1152139 and DMB-1124131, DoD/NPS/NSSEF Fellowship Awards N00244-09-1-0012 and N00244-09-1-0071, Chicago Biomedical Consortium with support from Searle Funds at The Chicago Community Trust and CCNE initiative of NIH Award U54 CA151880. Any opinions, findings, and conclusions or recommendations expressed in this publication are those of the authors and do not necessarily reflect the views of the sponsors. K.A.B. and X.L. gratefully acknowledge support from Northwestern University’s International Institute for Nanotechnology.

## Author information

Author notes

1. Xing Liao and Keith A. Brown: These authors contributed equally to this work

### Authors and Affiliations

1. Department of Materials Science and Engineering, Northwestern University, 2145 Sheridan Road, Evanston, 60208, Illinois, USA

   Xing Liao, Wooyoung Shim & Chad A. Mirkin
2. International Institute for Nanotechnology, Northwestern University, 2145 Sheridan Road, Evanston, 60208, Illinois, USA

   Xing Liao, Keith A. Brown, Abrin L. Schmucker, Guoliang Liu, Shu He, Wooyoung Shim & Chad A. Mirkin
3. Department of Chemistry, Northwestern University, 2145 Sheridan Road, Evanston, 60208, Illinois, USA

   Keith A. Brown, Abrin L. Schmucker, Guoliang Liu, Shu He & Chad A. Mirkin

Authors

1. Xing Liao

   View author publications

   You can also search for this author in
   PubMed Google Scholar
2. Keith A. Brown

   View author publications

   You can also search for this author in
   PubMed Google Scholar
3. Abrin L. Schmucker

   View author publications

   You can also search for this author in
   PubMed Google Scholar
4. Guoliang Liu

   View author publications

   You can also search for this author in
   PubMed Google Scholar
5. Shu He

   View author publications

   You can also search for this author in
   PubMed Google Scholar
6. Wooyoung Shim

   View author publications

   You can also search for this author in
   PubMed Google Scholar
7. Chad A. Mirkin

   View author publications

   You can also search for this author in
   PubMed Google Scholar

### Contributions

X.L., K.A.B. and C.A.M designed all experiments. X.L., K.A.B. and C.A.M contributed to this work in analysing results and drafting the manuscript. A.L.S., G.L., S.H. and W.S. also performed experiments and helped with revisions.

### Corresponding author

Correspondence to
Chad A. Mirkin.

## Ethics declarations

### Competing interests

The authors declare no competing financial interests.

## Supplementary information

### Supplementary Information

Supplementary Figures S1-S8 and Supplementary Methods (PDF 1194 kb)

## Rights and permissions

Reprints and permissions

## About this article

### Cite this article

Liao, X., Brown, K., Schmucker, A. *et al.* Desktop nanofabrication with massively multiplexed beam pen lithography.
*Nat Commun* **4**, 2103 (2013). https://doi.org/10.1038/ncomms3103

Download citation

- Received: 21 May 2013
- Accepted: 04 June 2013
- Published: 19 July 2013
- DOI: https://doi.org/10.1038/ncomms3103

### Share this article

Anyone you share the following link with will be able to read this content:

Get shareable link

Sorry, a shareable link is not currently available for this article.

Copy to clipboard

Provided by the Springer Nature SharedIt content-sharing initiative

## This article is cited by

- ### Massively parallel direct writing of nanoapertures using multi-optical probes and super-resolution near-fields

  - Changsu Park
  - Soobin Hwang
  - Shinill Kang

  *Microsystems & Nanoengineering* (2022)
- ### Massively parallel cantilever-free atomic force microscopy

  - Wenhan Cao
  - Nourin Alsharif
  - Keith A. Brown

  *Nature Communications* (2021)
- ### Dip-Pen Nanolithography(DPN): from Micro/Nano-patterns to Biosensing

  - Haonan Li
  - Zhao Wang
  - Shutao Wang

  *Chemical Research in Chinese Universities* (2021)
- ### Near-field sub-diffraction photolithography with an elastomeric photomask

  - Sangyoon Paik
  - Gwangmook Kim
  - Wooyoung Shim

  *Nature Communications* (2020)
- ### Polymer brush hypersurface photolithography

  - Carlos Carbonell
  - Daniel Valles
  - Adam B. Braunschweig

  *Nature Communications* (2020)

## Comments

By submitting a comment you agree to abide by our Terms and Community Guidelines. If you find something abusive or that does not comply with our terms or guidelines please flag it as inappropriate.


You have full access to this article via your institution.

Download PDF

Download PDF

Advertisement

## Explore content

- Research articles
- Reviews & Analysis
- News & Comment
- Videos
- Collections
- Subjects

- Follow us on Facebook
- Follow us on Twitter
- Sign up for alerts
- RSS feed


## About the journal

- Aims & Scope
- Editors
- Journal Information
- Open Access Fees and Funding
- Calls for Papers
- Editorial Values Statement
- Journal Metrics
- Editors' Highlights
- Contact
- Editorial policies
- Top Articles


## Publish with us

- For authors
- For Reviewers
- Language editing services
- Submit manuscript

## Search

Search articles by subject, keyword or author

Show results from

All journals
This journal

Search

Advanced search

### Quick links

- Explore articles by subject
- Find a job
- Guide to authors
- Editorial policies

Nature Communications (*Nat Commun*)

ISSN 2041-1723 (online)

## nature.com sitemap

### About Nature Portfolio

- About us
- Press releases
- Press office
- Contact us

### Discover content

- Journals A-Z
- Articles by subject
- protocols.io
- Nature Index

### Publishing policies

- Nature portfolio policies
- Open access

### Author & Researcher services

- Reprints & permissions
- Research data
- Language editing
- Scientific editing
- Nature Masterclasses
- Research Solutions

### Libraries & institutions

- Librarian service & tools
- Librarian portal
- Open research
- Recommend to library

### Advertising & partnerships

- Advertising
- Partnerships & Services
- Media kits
- Branded
  content

### Professional development

- Nature Careers
- Nature 
  Conferences

### Regional websites

- Nature Africa
- Nature China
- Nature India
- Nature Italy
- Nature Japan
- Nature Middle East

- Privacy
  Policy
- Use
  of cookies
- Your privacy choices/Manage cookies
- Legal
  notice
- Accessibility
  statement
- Terms & Conditions
- Your US state privacy rights

© 2024 Springer Nature Limited

xml version="1.0" encoding="UTF-8"?

Close banner

Close

Sign up for the *Nature Briefing* newsletter — what matters in science, free to your inbox daily.

Email address

Sign up

I agree my information will be processed in accordance with the *Nature* and Springer Nature Limited Privacy Policy.

Close banner

Close

Get the most important science stories of the day, free in your inbox.
Sign up for Nature Briefing
